# Supplementary material for: A Dynamic Estuarine Classification of the Vertical Structure Based on the Water Column Density Slope and the Potential Energy Anomaly
Source: MDPI journal article supplement (doi:10.3390/w15183294), 2023-09-18
Supplement: s1 [file s1]

Archive with 1 entries (1 files):
- water-2584821-supplementary.pdf
