# Supplementary material for: A Dynamic Estuarine Classification of the Vertical Structure Based on the Water Column Density Slope and the Potential Energy Anomaly
Source: MDPI journal article supplement (doi:10.3390/w15183294), 2023-09-18
Supplement: s1 [file s1 › water-2584821-supplementary.pdf]

## Supplementary Materials

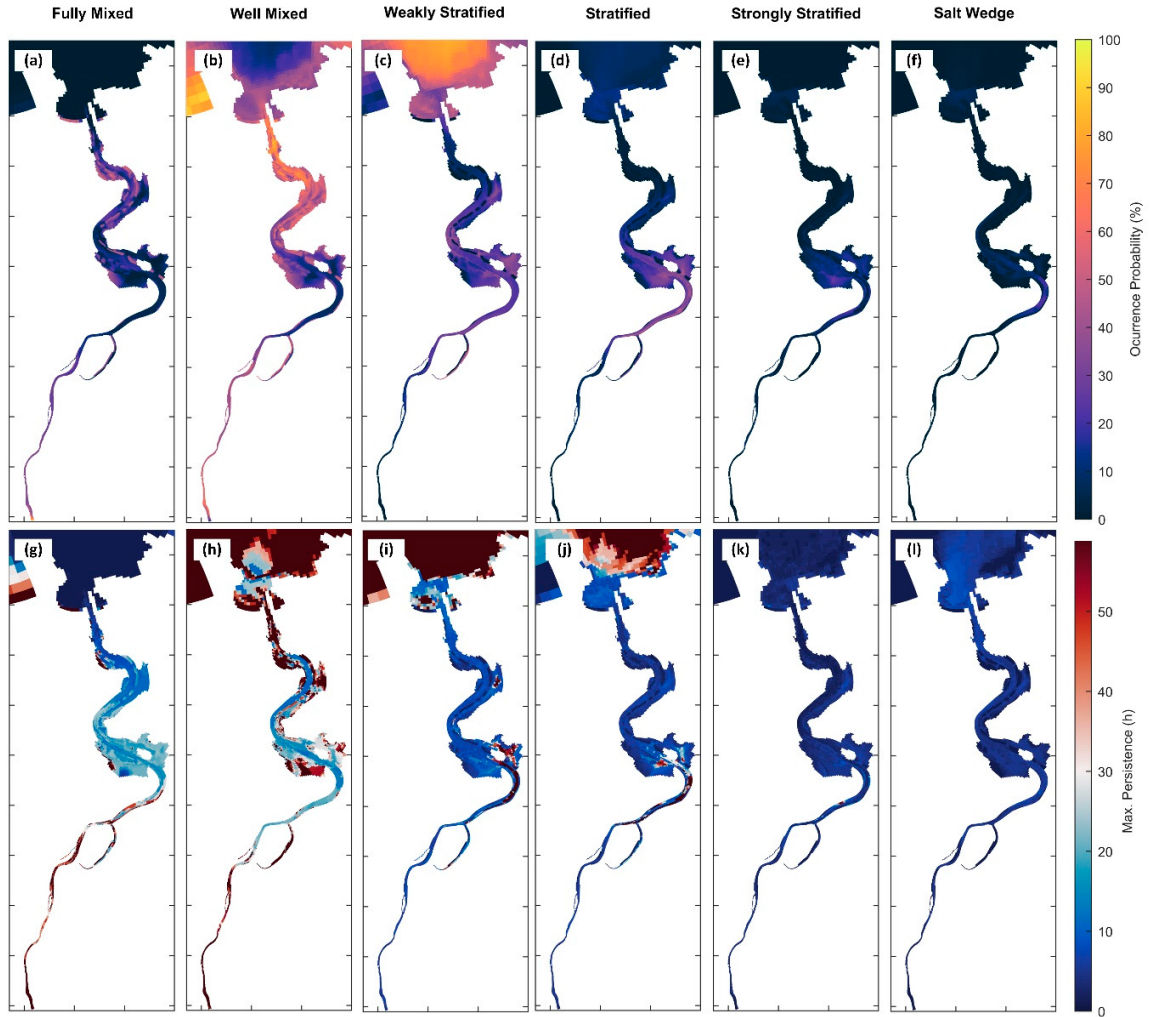

**Figure S1.** Occurrence probability (a–f) and maximum persistence in hours (g–l) for each vertical mixing class in the Suances estuary: fully mixed (a,g); well mixed (b,h); weakly stratified (c,i); stratified (d,j); strongly stratified (e,k) and salt wedge (f,l).for 2050 RCP 4.5 scenario.

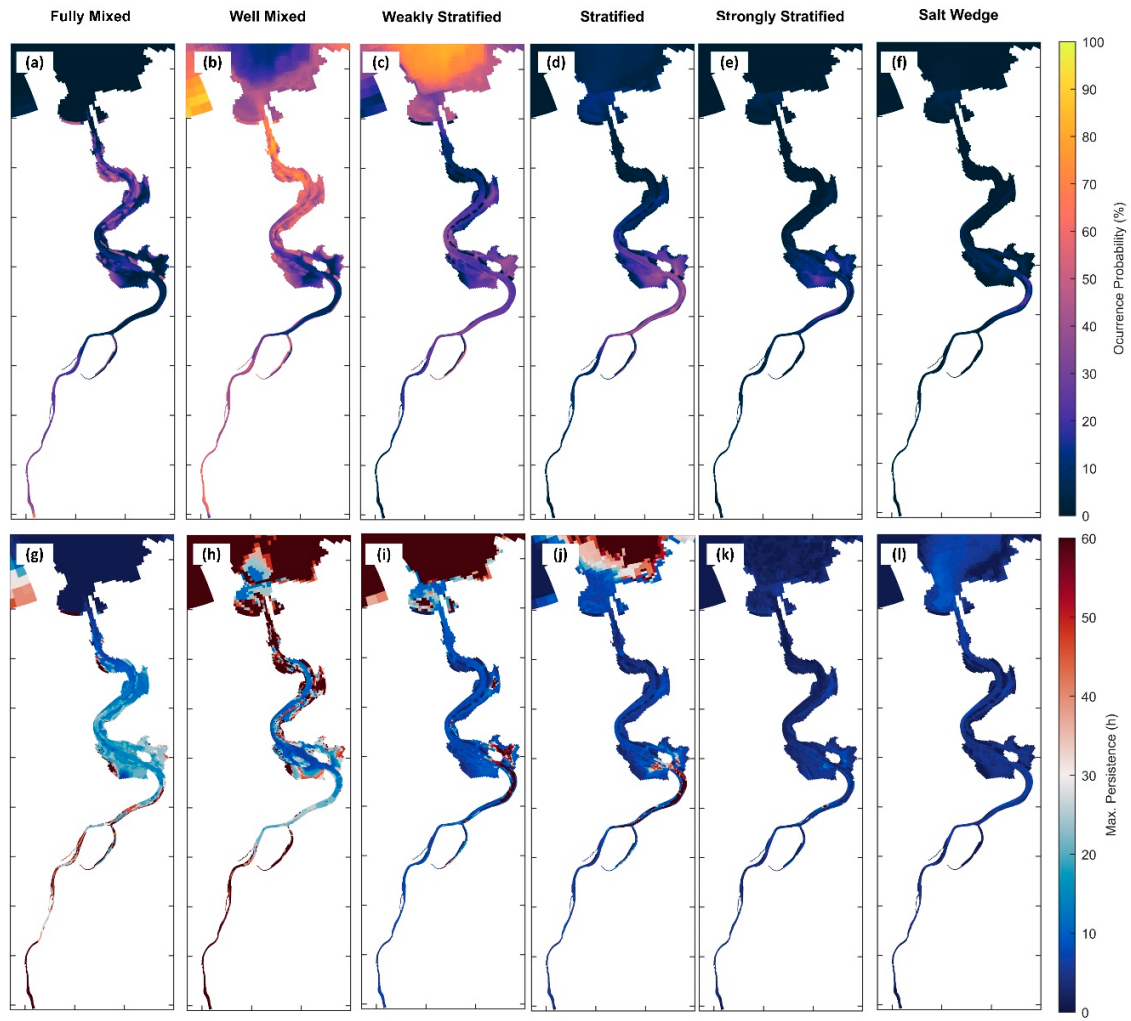

**Figure S2.** Occurrence probability (a–f) and maximum persistence in hours (g–l) for each vertical mixing class in the Suances estuary: fully mixed (a,g); well mixed (b,h); weakly stratified (c,i); stratified (d,j); strongly stratified (e,k) and salt wedge (f,l) for 2050 RCP 8.5 scenario.

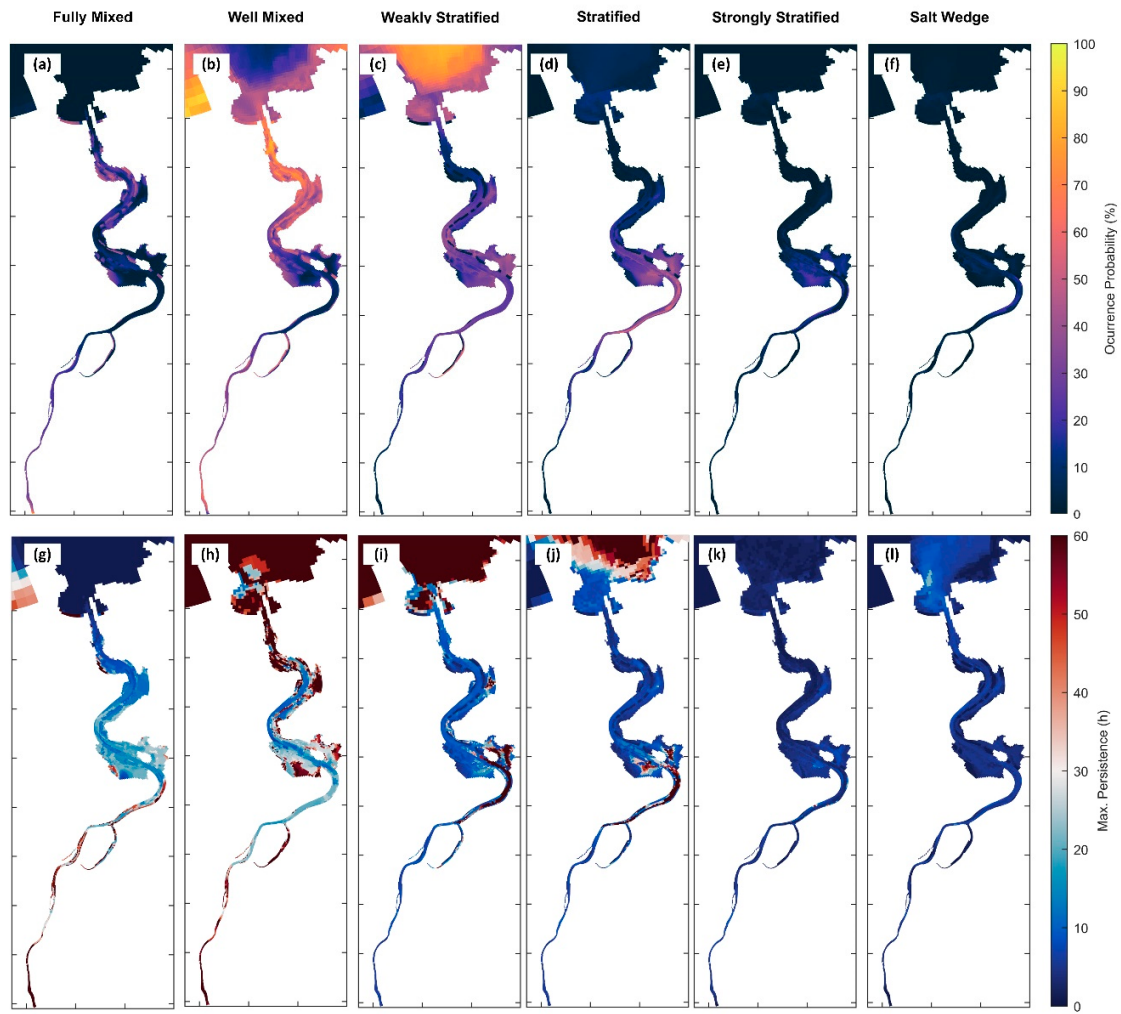

**Figure S3.** Occurrence probability (a–f) and maximum persistence in hours (g–l) for each vertical mixing class in the Suances estuary: fully mixed (a,g); well mixed (b,h); weakly stratified (c,i); stratified (d,j); strongly stratified (e,k) and salt wedge (f,l) for 2100 RCP 4.5 scenario.

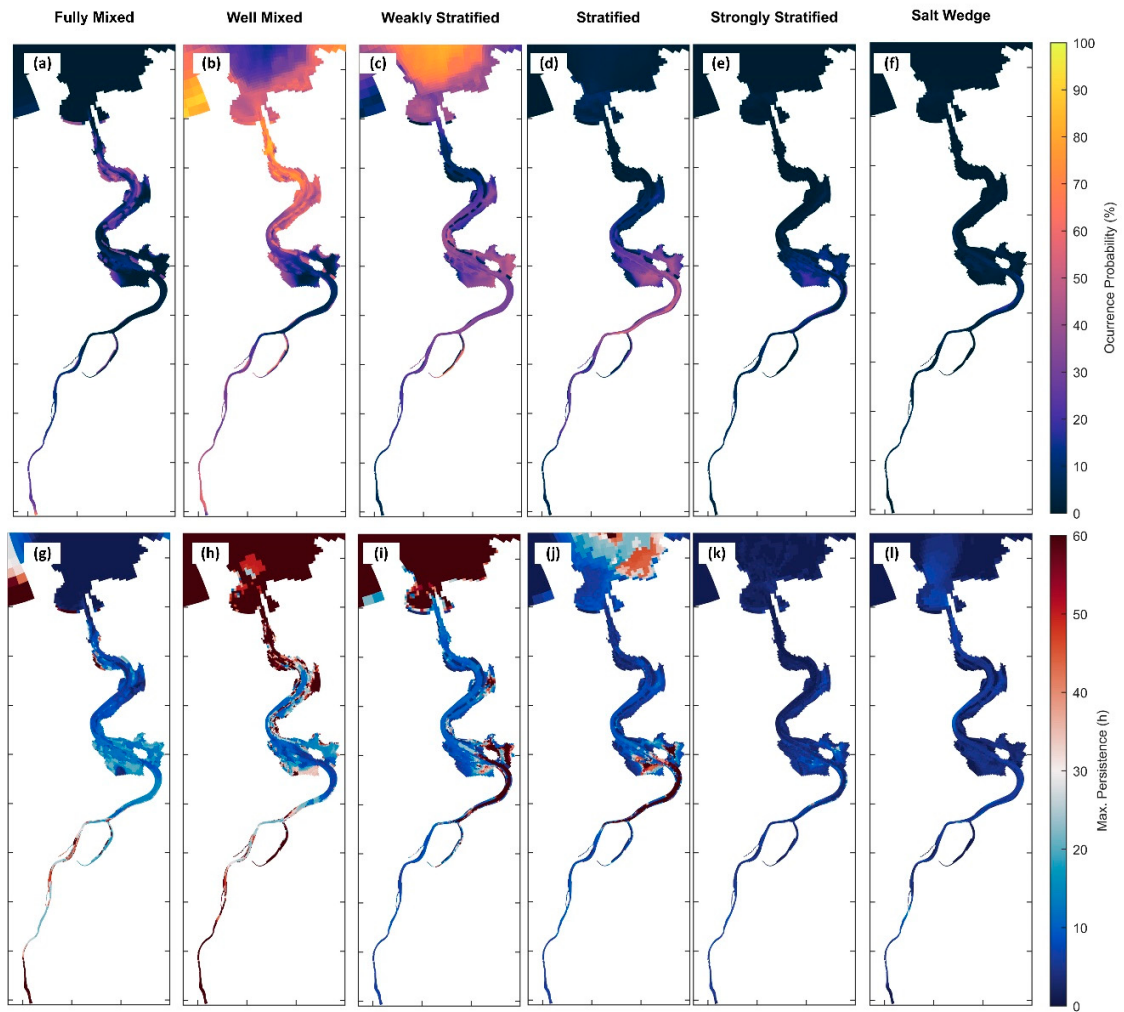

**Figure S4.** Occurrence probability (a–f) and maximum persistence in hours (g–l) for each vertical mixing class in the Suances estuary: fully mixed (a,g); well mixed (b,h); weakly stratified (c,i); stratified (d,j); strongly stratified (e,k) and salt wedge (f,l) for 2100 RCP 8.5 scenario.
